# Supplementary material for: A series of dysprosium clusters assembled by a substitution effect-driven out-to-in growth mechanism
Source: Royal Society of Chemistry journal article supplement (doi:10.1039/d1qi00101a), 2021-01-01
Supplement: d1qi00101a1.pdf [file d1qi00101a1.pdf]

## *Supporting Information*

### **Series of Dysprosium Clusters Assembled by a Substitution Effect-Driven Out-to-In Growth Mechanism**

Hai-Ling Wang,<sup>a</sup> Tong Liu,<sup>a</sup> Zhong-Hong Zhu,<sup>a,b,\*</sup> Jin-Mei Peng,<sup>a</sup> Hua-Hong Zou,<sup>a,\*</sup> Fu-Pei Liang<sup>a,c,\*</sup>

<sup>a</sup>State Key Laboratory for Chemistry and Molecular Engineering of Medicinal Resources, School of Chemistry and Pharmacy of Guangxi Normal University, Guilin 541004, P. R. China

<sup>b</sup>State Key Laboratory of Luminescent Materials and Devices, School of Materials Science and Engineering, South China University of Technology, 510640 Guangzhou, China

<sup>c</sup>Guangxi Key Laboratory of Electrochemical and Magnetochemical Functional Materials, College of Chemistry and Bioengineering, Guilin University of Technology, Guilin 541004, P. R. China

\*E-mail (Corresponding author): [18317725515@163.com](mailto:18317725515@163.com) (Z.-H. Zhu), [gxnuchem@foxmail.com](mailto:gxnuchem@foxmail.com) (H.-H. Zou), [fliangoffice@yahoo.com](mailto:fliangoffice@yahoo.com) (F.-P. Liang).

## Table of Contents:

| Supporting Tables  |                                                                                                                                                                                                          |
|--------------------|----------------------------------------------------------------------------------------------------------------------------------------------------------------------------------------------------------|
| <b>Table S1</b>    | Crystallographic data of the clusters <b>1–3</b> .                                                                                                                                                       |
| <b>Table S2</b>    | Selected bond lengths (Å) and angles (°) of <b>1</b> .                                                                                                                                                   |
| <b>Table S3</b>    | Selected bond lengths (Å) and angles (°) of <b>2</b> .                                                                                                                                                   |
| <b>Table S4</b>    | Selected bond lengths (Å) and angles (°) of <b>3</b> .                                                                                                                                                   |
| Supporting Figures |                                                                                                                                                                                                          |
| <b>Figure S1</b>   | Infrared spectra (IR) of clusters <b>1–3</b> .                                                                                                                                                           |
| <b>Figure S2</b>   | TG curve of clusters <b>1–3</b> .                                                                                                                                                                        |
| <b>Figure S3</b>   | Powder diffraction pattern (PXRD) of clusters <b>1–3</b> .                                                                                                                                               |
| <b>Figure S4</b>   | Temperature dependence of $\chi_m T$ for clusters <b>1–3</b> (a, c and e); $M$ vs. $H$ plots of clusters <b>1–3</b> (b, d and f).                                                                        |
| <b>Figure S5</b>   | Loop curve graph of clusters <b>1–3</b> at 2 K.                                                                                                                                                          |
| <b>Figure S6</b>   | The imaginary parts of the AC susceptibility of clusters <b>1–3</b> tested under external DC field values in the range of 0-4000 Oe at 2 K for <b>1</b> (left), <b>2</b> (middle), and <b>3</b> (right). |
| <b>Figure S7</b>   | $\ln(\tau)$ vs. $T^{-1}$ plots for <b>1</b> (a), <b>2</b> (b), and <b>3</b> (c), the solid lines show the best fits with the Debye formula (linear).                                                     |

## Experimental Section

### Materials and Measurements.

All reagents were obtained from commercial sources and used without further purification. Elemental analyses for C, and H were performed on a vario MICRO cube. Infrared spectra were recorded by transmission through KBr pellets containing *ca.* 0.5% of the complexes using a PE Spectrum FT-IR spectrometer (400-4,000  $\text{cm}^{-1}$ ; Figure S1). Thermogravimetric analyses (TGA) were conducted in a flow of nitrogen at a heating rate of 5  $^{\circ}\text{C}/\text{min}$  using a NETZSCH TG 209 F3 (Figure S2). Powder X-ray diffraction (PXRD) spectra were recorded on either a D8 Advance (Bruker) diffractometer at 293 K (Mo-K $\alpha$ ). The samples were prepared by crushing crystals and the powder placed on a grooved aluminum plate. Diffraction patterns were recorded from 5 $^{\circ}$  to 55 $^{\circ}$  at a rate of 5 $^{\circ}$   $\text{min}^{-1}$  (Figure S3). Measurements of magnetic susceptibility were carried out within the temperature range of 2–300 K using a Quantum Design MPMS SQUID magnetometer equipped with a 7 T magnet. The diamagnetic corrections for these complexes were estimated using Pascal's constants, and magnetic data were corrected for diamagnetic contributions of the sample holder. Alternating current susceptibility measurements were performed from powdered samples to determine the in-phase and out-of-phase components of the magnetic susceptibility. The data were collected by increasing the temperature from 2 K to 15 K within frequencies ranging from 1 to 1,000 Hz, under 0 Oe and 1200 Oe. In the samples where free movement of crystallites was prevented, silicone grease was employed for embedding.

### Single-crystal X-ray crystallography.

Diffraction data for the complex were collected on a Bruker SMART CCD diffractometer (Mo-K $\alpha$  radiation and  $\lambda = 0.71073$  Å) in  $\Phi$  and  $\omega$  scan modes. The structures were solved by direct methods, followed by difference Fourier syntheses, and then refined by full-matrix least-squares techniques on  $F^2$  using *SHELXL*<sup>[1]</sup>. All other non-hydrogen atoms were refined with anisotropic thermal parameters. Hydrogen atoms were placed at calculated positions and isotropically refined using a riding model. Table S3 summarizes X-ray crystallographic data and refinement details for the complex. The CCDC reference numbers are 2058342, 2058346 and 2058348 for **1–3**.

[1]Sheldrick, G. M. *Acta Crystallogr., Sect. C: Struct. Chem.* **2015**, *71*, 3-8.

### The synthesis method.

**H<sub>4</sub>L<sup>1</sup>-H<sub>4</sub>L<sup>3</sup>**: The synthesis of organic ligands H<sub>4</sub>L<sup>1</sup>–H<sub>4</sub>L<sup>3</sup> refers to the reported method.<sup>[2]</sup>

**1**: Add 0.05 mmol (approximately 25 mg) ligand H<sub>4</sub>L<sup>1</sup>, 0.4 mmol Dy(NO<sub>3</sub>)<sub>3</sub>·6H<sub>2</sub>O (approximately 183 mg), 1.5 mL CH<sub>3</sub>OH, 0.5 mL CH<sub>3</sub>CN, and 0.15 mL triethylamine to the Pyrex whose one end is about 25 cm long In the tube, shake and sonicate for 15 min. Place the sealed Pyrex tube in an oven at 80  $^{\circ}\text{C}$ , take it out three days later, slowly cool to room temperature, and precipitate yellow lumpy crystals. The yield is about 52.3% (calculated with the amount of ligand). Elemental analysis theoretical value (C<sub>84</sub>H<sub>93</sub>Dy<sub>16</sub>N<sub>29</sub>O<sub>80</sub>): C, 18.72%; H, 1.74%; N, 7.54%; experimental value: C, 18.44%; H, 1.95%; N, 7.23%. Infrared spectrum data (IR, KBr pellet,  $\text{cm}^{-1}$ ): 3343.17(s), 1614.29(m), 1501.04(w), 1461.39(w), 1384.32(vs), 1201.61(w), 866.95(w), 760.12(w)).

**2**: Add 0.05 mmol (approximately 27 mg) ligand H<sub>4</sub>L<sup>2</sup>, 0.4 mmol Dy(NO<sub>3</sub>)<sub>3</sub>·6H<sub>2</sub>O (approximately 183 mg), 1.5 mL CH<sub>3</sub>OH, 0.5 mL CH<sub>3</sub>CN, and 0.15 mL triethylamine to the Pyrex whose one end is about 25 cm long In the tube, shake and sonicate for 15 min. Place the sealed Pyrex tube in an oven at 80  $^{\circ}\text{C}$ , take it out three days later, slowly cool to room temperature, and precipitate brown lumpy

crystals. The yield is about 55.4% (calculated with the amount of ligand). Elemental analysis theoretical value ( $C_{127}H_{134}Dy_{10}N_{30}O_{53}$ ): C, 33.50%; H, 2.97%; N, 9.23%; experimental value: C, 33.22%; H, 3.12%; N, 9.11%. Infrared spectrum data (IR, KBr pellet,  $cm^{-1}$ ): 3470.78(s), 2376.35(w), 1606.06(vs), 1501.31(s), 1430.00(s), 1384.37(m), 1221.08(m), 865.28(m), 748.59(w).

**3:** Add 0.05 mmol (about 30 mg) ligand  $H_4L^3$ , 0.4 mmol  $Dy(NO_3)_3 \cdot 6H_2O$  (about 183 mg), 1.5 mL  $CH_3OH$ , 0.5 mL  $CH_3CN$  and 0.15 mL triethylamine to the Pyrex whose one end is about 25 cm long. In the tube, shake and sonicate for 15 min. Place the sealed Pyrex tube in an oven at 80 °C, take it out three days later, slowly cool to room temperature, and precipitate yellow lumpy crystals. The yield is about 51.3% (calculated with the amount of ligand). Elementary analysis theoretical value ( $C_{85}H_{109}Dy_5N_{16}O_{26}$ ): C, 39.52%; H, 4.25%; N, 8.68%; experimental value: C, 39.35%; H, 4.03%; N, 8.53%. Infrared spectrum data (IR, KBr pellet,  $cm^{-1}$ ): 3432.18(s), 2374.23(w), 1616.26(vs), 1501.41(s), 1432.50(s), 1379.27(m), 1211.08(m), 866.18(m), 749.33(w).

[2] Z.-R. Luo, H.-L. Wang, Z.-H. Zhu, T. Liu, X.-F. Ma, H.-F. Wang, H.-H. Zou and F.-P. Liang, Assembly of  $Dy_{60}$  and  $Dy_{30}$  Cage-Shaped Nanoclusters. *Commun. Chem.* 2020, **3**(1), 30. <https://doi.org/10.1038/s42004-020-0276-3>.

**Table S1.** Crystallographic data of the clusters 1–3.

|                                                                 | <b>1</b>                                                                         | <b>2</b>                                                                           | <b>3</b>                                                                         |
|-----------------------------------------------------------------|----------------------------------------------------------------------------------|------------------------------------------------------------------------------------|----------------------------------------------------------------------------------|
| Formula                                                         | C <sub>84</sub> H <sub>93</sub> Dy <sub>16</sub> N <sub>29</sub> O <sub>80</sub> | C <sub>127</sub> H <sub>134</sub> Dy <sub>10</sub> N <sub>30</sub> O <sub>53</sub> | C <sub>85</sub> H <sub>109</sub> Dy <sub>5</sub> N <sub>16</sub> O <sub>26</sub> |
| Formula weight                                                  | 5388.87                                                                          | 4553.63                                                                            | 2585.39                                                                          |
| <i>T</i> , K                                                    | 100.00(10)                                                                       | 100.00(10)                                                                         | 100.00(10)                                                                       |
| Crystal system                                                  | monoclinic                                                                       | triclinic                                                                          | monoclinic                                                                       |
| Space group                                                     | <i>P</i> 2 <sub>1</sub> / <i>n</i>                                               | <i>P</i> -1                                                                        | <i>I</i> 2/ <i>a</i>                                                             |
| <i>a</i> , Å                                                    | 22.7736(8)                                                                       | 14.9384(7)                                                                         | 20.1938(3)                                                                       |
| <i>b</i> , Å                                                    | 34.9804(5)                                                                       | 16.6305(6)                                                                         | 23.6957(3)                                                                       |
| <i>c</i> , Å                                                    | 24.2097(10)                                                                      | 17.5360(7)                                                                         | 20.2544(3)                                                                       |
| <i>α</i> , °                                                    | 90                                                                               | 79.223(3)                                                                          | 90                                                                               |
| <i>β</i> , °                                                    | 109.462(4)                                                                       | 88.320(4)                                                                          | 101.8860(10)                                                                     |
| <i>γ</i> , °                                                    | 90                                                                               | 73.352(4)                                                                          | 90                                                                               |
| <i>V</i> , Å <sup>3</sup>                                       | 18184.2(11)                                                                      | 4098.9(3)                                                                          | 9484.1(2)                                                                        |
| <i>Z</i>                                                        | 4                                                                                | 1                                                                                  | 4                                                                                |
| <i>D</i> <sub>c</sub> , g cm <sup>-3</sup>                      | 1.968                                                                            | 1.844                                                                              | 1.811                                                                            |
| <i>μ</i> , mm <sup>-1</sup>                                     | 6.568                                                                            | 4.583                                                                              | 3.973                                                                            |
| <i>F</i> (000)                                                  | 9984.0                                                                           | 2188.0                                                                             | 5084.0                                                                           |
| 2 <i>θ</i> range for data collection/°                          | 3.224, 60.708                                                                    | 3.748, 49.998                                                                      | 4.11, 60.454                                                                     |
| Tot. Data                                                       | 171635                                                                           | 44675                                                                              | 50510                                                                            |
| Uniq. Data                                                      | 42726                                                                            | 14423                                                                              | 11525                                                                            |
| <i>R</i> <sub>int</sub>                                         | 0.0797                                                                           | 0.0561                                                                             | 0.0840                                                                           |
| Observed data [ <i>I</i> > 2σ( <i>I</i> )]                      | 42726                                                                            | 14423                                                                              | 11525                                                                            |
| <i>N</i> <sub>ref</sub> , <i>N</i> <sub>par</sub>               | 709, 1739                                                                        | 99, 1051                                                                           | 2,605                                                                            |
| <i>R</i> <sub>1</sub> <sup>a</sup> ( <i>I</i> > 2σ( <i>I</i> )) | 0.0976                                                                           | 0.0678                                                                             | 0.1363                                                                           |
| <i>wR</i> <sub>2</sub> <sup>b</sup> (all data)                  | 0.3245                                                                           | 0.2110                                                                             | 0.3251                                                                           |
| GOF                                                             | 1.024                                                                            | 1.040                                                                              | 1.257                                                                            |

$$^a R_1 = \Sigma ||F_o| - |F_c|| / \Sigma |F_o|, \quad ^b wR_2 = [\Sigma w(F_o^2 - F_c^2)^2 / \Sigma w(F_o^2)^2]^{1/2}$$

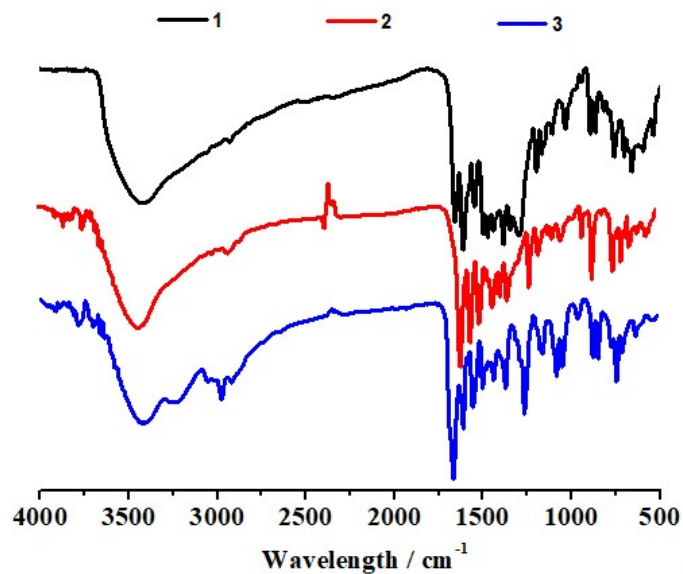

Figure S1. Infrared spectra (IR) of clusters 1–3.

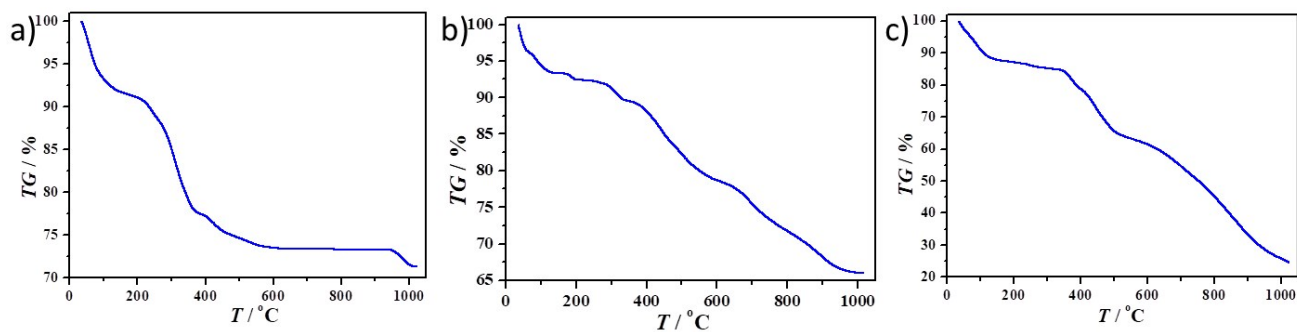

Figure S2. TG curve of clusters 1-3.

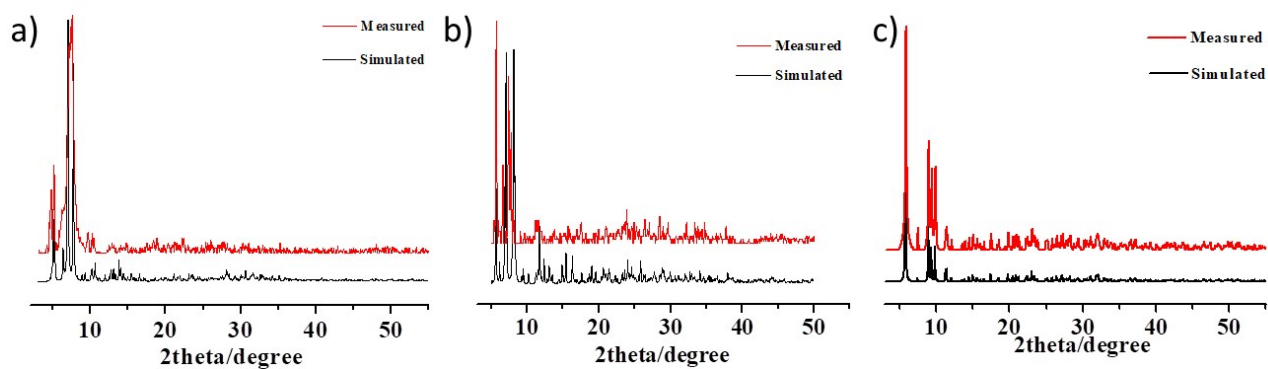

Figure S3. Powder diffraction pattern (PXRD) of clusters 1–3.

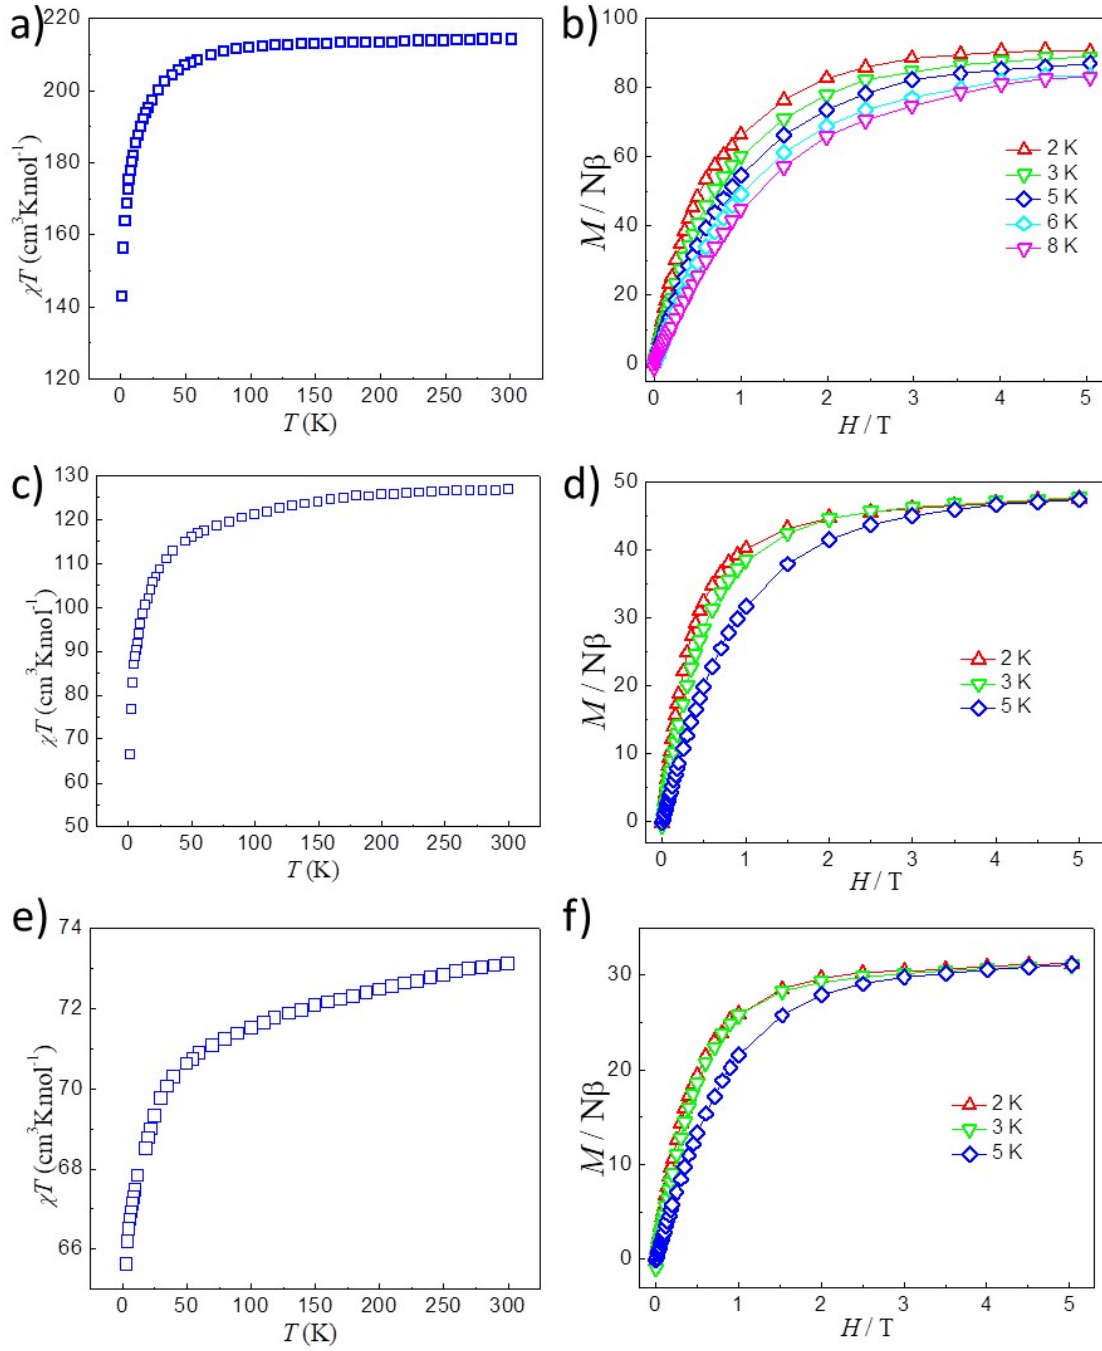

**Figure S4.** (a, c and e) Temperature dependence of  $\chi_m T$  for clusters 1–3; (b, d and f)  $M$  vs.  $H$  plots of clusters 1–3.

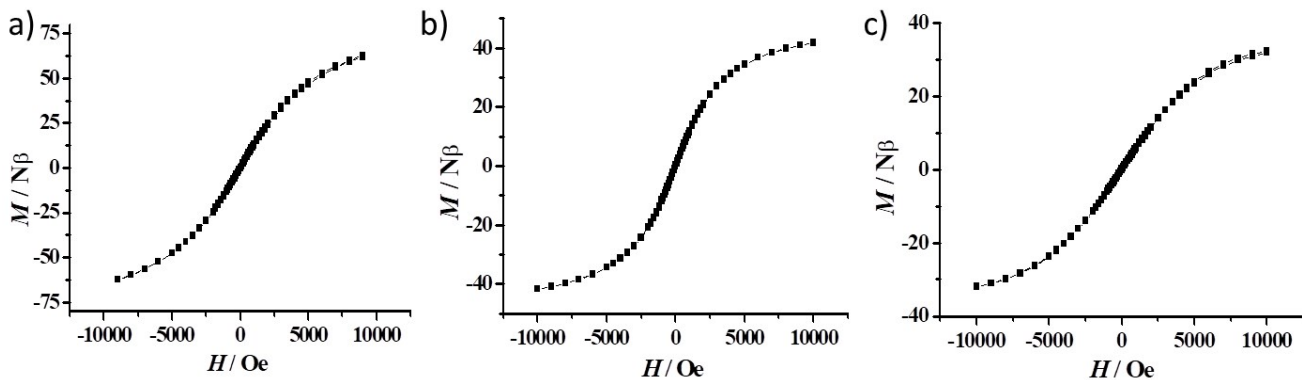

**Figure 5.** Loop curve graph of clusters 1–3 (a–c) at 2 K.

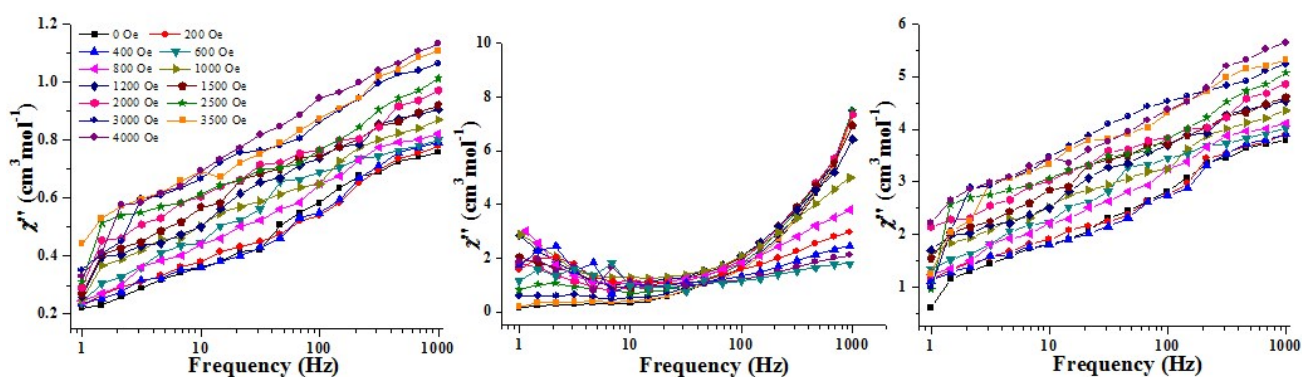

**Figure S6.** The imaginary parts of the AC susceptibility of clusters 1–3 tested under external DC field values in the range of 0-4000 Oe at 2 K for 1 (left), 2 (middle), and 3 (right).

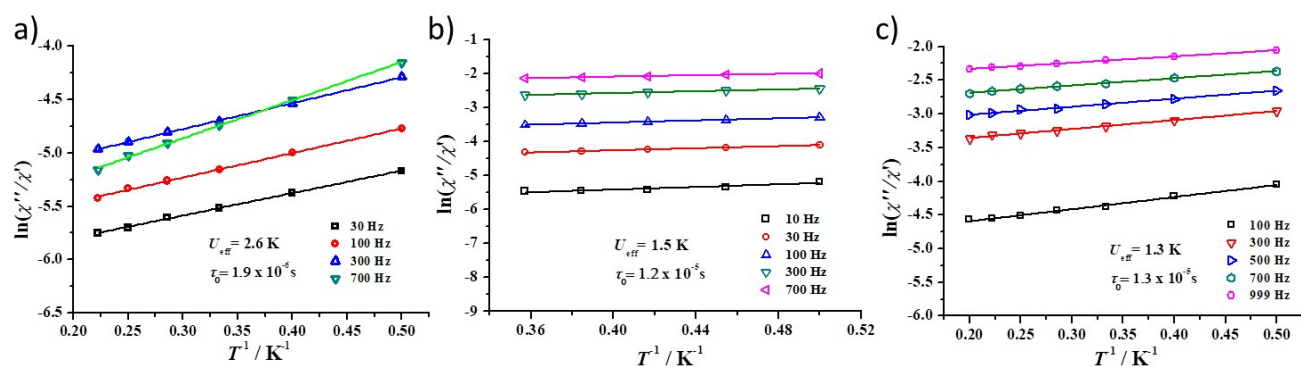

**Figure S7.**  $\ln(\tau)$  vs.  $T^{-1}$  plots for 1 (a), 2 (b), and 3 (c), the solid lines show the best fits with the Debye formula (linear).

**Table S2.** Selected bond lengths (Å) and angles (°) of 1.

| Bond lengths (Å) |           |         |           |          |           |
|------------------|-----------|---------|-----------|----------|-----------|
| Dy1-O9           | 2.344(15) | Dy6-O25 | 2.411(15) | Dy11-O65 | 2.660(18) |
| Dy1-O10          | 2.357(14) | Dy6-O30 | 2.36(2)   | Dy11-O66 | 2.45(2)   |



---

|         |           |         |           |          |           |
|---------|-----------|---------|-----------|----------|-----------|
| Dy1-O23 | 2.363(13) | Dy6-O33 | 2.391(11) | Dy11-N6  | 2.486(18) |
| Dy1-O24 | 2.358(14) | Dy6-O34 | 2.375(13) | Dy11-N25 | 2.862(15) |
| Dy1-O44 | 2.46(2)   | Dy6-O80 | 2.351(12) | Dy12-O4  | 2.393(14) |
| Dy1-O60 | 2.514(19) | Dy6-O81 | 2.395(13) | Dy12-O5  | 2.363(14) |
| Dy1-O61 | 2.49(2)   | Dy7-O19 | 1.939(17) | Dy12-O17 | 2.315(13) |
| Dy1-N15 | 2.482(18) | Dy7-O20 | 2.897(17) | Dy12-O18 | 2.416(15) |
| Dy1-N16 | 2.491(16) | Dy7-O25 | 2.81(2)   | Dy12-O19 | 2.419(14) |
| Dy1-N27 | 2.93(2)   | Dy7-O26 | 2.038(15) | Dy12-O27 | 2.359(14) |
| Dy2-O10 | 2.376(15) | Dy7-O27 | 2.68(2)   | Dy12-O28 | 2.345(15) |
| Dy2-O11 | 2.319(19) | Dy7-O30 | 1.960(15) | Dy12-O29 | 2.416(11) |
| Dy2-O21 | 2.289(16) | Dy7-O39 | 2.60(6)   | Dy13-O27 | 2.290(14) |
| Dy2-O22 | 2.310(18) | Dy8-O13 | 2.386(15) | Dy13-O28 | 2.416(13) |
| Dy2-O23 | 2.442(13) | Dy8-O14 | 2.475(17) | Dy13-O29 | 2.389(11) |
| Dy2-O45 | 2.391(19) | Dy8-O15 | 2.466(14) | Dy13-O30 | 2.269(15) |
| Dy2-O57 | 2.26(3)   | Dy8-O16 | 2.353(14) | Dy13-O31 | 2.298(14) |
| Dy2-O58 | 2.64(3)   | Dy8-O17 | 2.709(15) | Dy13-O32 | 2.338(13) |
| Dy2-N18 | 2.47(2)   | Dy8-O18 | 2.343(12) | Dy13-O33 | 2.395(12) |
| Dy2-N24 | 2.671(19) | Dy8-O19 | 2.370(16) | Dy13-O34 | 2.385(13) |
| Dy3-O11 | 2.558(17) | Dy8-O20 | 2.333(19) | Dy14-O7  | 2.389(13) |
| Dy3-O15 | 2.404(17) | Dy8-O46 | 2.54(2)   | Dy14-O8  | 2.329(13) |
| Dy3-O20 | 2.421(15) | Dy9-O1  | 2.215(15) | Dy14-O32 | 2.424(13) |
| Dy3-O21 | 2.19(2)   | Dy9-O2  | 2.341(14) | Dy14-O33 | 2.387(14) |
| Dy3-O22 | 2.567(15) | Dy9-O1  | 2.215(15) | Dy14-O34 | 2.369(11) |
| Dy3-O26 | 2.337(14) | Dy9-O2  | 2.341(14) | Dy14-O42 | 2.46(3)   |
| Dy3-O36 | 2.32(3)   | Dy9-O13 | 2.362(12) | Dy14-O77 | 2.53(2)   |
| Dy3-O37 | 2.329(18) | Dy9-O14 | 2.32(2)   | Dy14-O79 | 2.43(2)   |
| Dy4-O22 | 2.315(12) | Dy9-O15 | 2.370(16) | Dy14-N12 | 2.486(17) |
| Dy4-O23 | 2.287(15) | Dy9-O47 | 2.37(2)   | Dy14-N28 | 2.77(3)   |
| Dy4-O24 | 2.348(14) | Dy9-O49 | 2.42(2)   | Dy15-O6  | 2.310(14) |
| Dy4-O25 | 2.297(16) | Dy10-O2 | 2.349(14) | Dy15-O7  | 2.320(14) |

---

|         |           |          |           |          |           |
|---------|-----------|----------|-----------|----------|-----------|
| Dy4-O26 | 2.332(15) | Dy10-O3  | 2.365(13) | Dy15-O31 | 2.351(13) |
| Dy4-O38 | 2.79(3)   | Dy10-O13 | 2.400(13) | Dy15-O32 | 2.349(15) |
| Dy4-O80 | 2.568(13) | Dy10-O16 | 2.360(16) | Dy15-O71 | 2.37(2)   |
| Dy4-O81 | 2.312(12) | Dy10-O50 | 2.56(2)   | Dy15-O75 | 2.56(2)   |
| Dy5-O9  | 2.366(16) | Dy10-O51 | 2.47(2)   | Dy15-O76 | 2.44(2)   |
| Dy5-O12 | 2.318(11) | Dy10-O53 | 2.516(16) | Dy15-N9  | 2.476(14) |
| Dy5-O24 | 2.408(11) | Dy10-O54 | 2.401(17) | Dy15-N10 | 2.469(16) |
| Dy5-O43 | 2.414(15) | Dy10-O2  | 2.349(14) | Dy16-O6  | 2.378(13) |
| Dy5-O62 | 2.555(19) | Dy10-O3  | 2.365(13) | Dy16-O28 | 2.391(12) |
| Dy5-O63 | 2.46(2)   | Dy11-O3  | 2.342(15) | Dy16-O29 | 2.369(14) |
| Dy5-O80 | 2.335(16) | Dy11-O4  | 2.325(12) | Dy16-O31 | 2.384(13) |
| Dy5-O9  | 2.366(16) | Dy11-O16 | 2.395(14) | Dy16-O41 | 2.40(3)   |
| Dy5-O12 | 2.318(11) | Dy11-O17 | 2.304(15) | Dy16-O68 | 2.48(2)   |
| Dy6-O8  | 2.386(14) | Dy11-O18 | 2.385(12) | Dy16-O70 | 2.46(2)   |
| Dy6-O12 | 2.395(14) | Dy11-O35 | 2.423(14) | Dy16-N7  | 2.482(15) |

**Bond angles (°)**

|             |          |              |          |              |          |
|-------------|----------|--------------|----------|--------------|----------|
| O9-Dy1-O10  | 165.1(6) | O12-Dy6-Dy4  | 99.8(3)  | O4-Dy11-O16  | 144.5(5) |
| O9-Dy1-O23  | 107.2(5) | O12-Dy6-Dy5  | 40.6(3)  | O4-Dy11-O18  | 71.6(4)  |
| O9-Dy1-O24  | 67.1(5)  | O12-Dy6-Dy13 | 125.7(3) | O27-Dy12-O4  | 111.7(6) |
| O9-Dy1-O44  | 86.0(6)  | O12-Dy6-Dy4  | 99.8(3)  | O27-Dy12-O5  | 139.4(5) |
| O9-Dy1-O60  | 113.2(6) | O19-Dy7-O20  | 68.3(7)  | O27-Dy12-O18 | 73.5(5)  |
| O9-Dy1-O61  | 66.0(7)  | O19-Dy7-O25  | 140.1(7) | O27-Dy12-O19 | 70.9(7)  |
| O9-Dy1-N15  | 63.7(5)  | O19-Dy7-O26  | 115.4(6) | O27-Dy12-O29 | 72.8(5)  |
| O9-Dy1-N16  | 124.9(6) | O19-Dy7-O27  | 71.6(6)  | O28-Dy12-O4  | 144.2(4) |
| O10-Dy2-O23 | 66.4(4)  | O19-Dy7-O30  | 129.4(6) | O28-Dy12-O5  | 70.9(5)  |
| O10-Dy2-O45 | 124.4(6) | O19-Dy7-O39  | 92.8(15) | O30-Dy13-O34 | 73.8(7)  |
| O10-Dy2-O58 | 108.5(7) | O26-Dy7-O20  | 67.6(6)  | O30-Dy13-O27 | 75.6(6)  |
| O10-Dy2-N18 | 61.9(6)  | O26-Dy7-O25  | 68.0(6)  | O30-Dy13-O28 | 77.2(6)  |
| O10-Dy2-N24 | 90.0(6)  | O16-Dy8-O13  | 72.2(5)  | O30-Dy13-O29 | 133.3(5) |
| O11-Dy2-Dy3 | 46.0(4)  | O16-Dy8-O14  | 75.3(6)  | O30-Dy13-O31 | 115.4(6) |

|              |          |             |          |              |           |
|--------------|----------|-------------|----------|--------------|-----------|
| O11-Dy2-O10  | 124.2(7) | O16-Dy8-O15 | 131.5(5) | O30-Dy13-O32 | 144.9(6)  |
| O11-Dy3-O22  | 62.5(5)  | O16-Dy8-O17 | 67.6(5)  | O30-Dy13-O33 | 75.2(5)   |
| O15-Dy3-Dy2  | 172.9(3) | O16-Dy8-O19 | 134.0(6) | O8-Dy14-O7   | 125.9(5)  |
| O15-Dy3-Dy4  | 123.5(4) | O16-Dy8-O46 | 73.1(7)  | O8-Dy14-O32  | 141.6(5)  |
| O15-Dy3-Dy7  | 70.1(4)  | O18-Dy8-O13 | 128.2(4) | O8-Dy14-O33  | 74.7(5)   |
| O15-Dy3-Dy7A | 83.3(3)  | O18-Dy8-O14 | 139.1(6) | O8-Dy14-O34  | 71.7(4)   |
| O15-Dy3-O11  | 132.7(5) | O1-Dy9-O2   | 137.3(5) | O8-Dy14-O42  | 103.4(10) |
| O15-Dy3-O20  | 68.3(6)  | O1-Dy9-O13  | 153.8(5) | O8-Dy14-O77  | 77.0(6)   |
| O22-Dy4-O24  | 90.0(5)  | O1-Dy9-O14  | 110.9(7) | O8-Dy14-O79  | 131.7(6)  |
| O22-Dy4-O26  | 74.3(5)  | O1-Dy9-O15  | 83.8(5)  | O8-Dy14-N12  | 73.3(5)   |
| O22-Dy4-O38  | 72.3(7)  | O1-Dy9-O47  | 84.1(8)  | O32-Dy15-O31 | 76.5(5)   |
| O22-Dy4-O80  | 148.1(5) | O1-Dy9-O49  | 89.6(8)  | O32-Dy15-O71 | 141.1(6)  |
| O23-Dy4-O22  | 75.7(5)  | O1-Dy9-N1   | 72.6(6)  | O32-Dy15-O75 | 68.1(6)   |
| O23-Dy4-O24  | 74.0(5)  | O1-Dy9-N19  | 87.3(9)  | O32-Dy15-O76 | 74.0(6)   |
| O23-Dy4-O25  | 98.2(7)  | O2-Dy10-O13 | 67.8(4)  | O32-Dy15-N9  | 141.3(5)  |
| O9-Dy5-O63   | 147.7(6) | O2-Dy10-O16 | 102.8(6) | O71-Dy15-O75 | 145.8(7)  |
| O9-Dy5-O81   | 130.0(5) | O2-Dy10-O50 | 118.7(8) | O71-Dy15-O76 | 138.6(8)  |
| O9-Dy5-N13   | 63.6(5)  | O2-Dy10-O51 | 78.2(7)  | O71-Dy15-N9  | 77.2(6)   |
| O12-Dy5-Dy1  | 137.2(5) | O2-Dy10-O53 | 64.1(6)  | O6-Dy16-O28  | 128.3(5)  |
| O12-Dy5-Dy4  | 102.2(3) | O2-Dy10-O54 | 109.4(6) | O6-Dy16-O31  | 65.8(5)   |
| O12-Dy5-Dy6  | 42.3(3)  | O2-Dy10-N3  | 63.2(5)  | O6-Dy16-O41  | 126.1(10) |
| O12-Dy5-O9   | 123.3(6) | O3-Dy11-O16 | 68.3(5)  | O6-Dy16-O68  | 114.4(6)  |
| O8-Dy6-O12   | 82.5(5)  | O3-Dy11-O18 | 130.4(5) | O6-Dy16-O70  | 70.3(7)   |
| O8-Dy6-O25   | 118.5(7) | O3-Dy11-O35 | 75.3(7)  | O6-Dy16-N7   | 62.2(5)   |
| O8-Dy6-O33   | 73.6(4)  | O3-Dy11-O65 | 125.0(6) | O6-Dy16-N21  | 89.2(7)   |
| O8-Dy6-O81   | 146.8(4) | O3-Dy11-O66 | 148.6(6) | O28-Dy16-O41 | 72.0(7)   |

**Table S3.** Selected bond lengths (Å) and angles (°) of **2**.

| Bond lengths (Å)    |           |         |           |         |           |
|---------------------|-----------|---------|-----------|---------|-----------|
| Dy1-O6 <sup>1</sup> | 2.348(10) | Dy2-N2  | 2.552(9)  | Dy4-O15 | 2.431(14) |
| Dy1-O3              | 2.304(10) | Dy2-N15 | 2.519(18) | Dy4-O16 | 2.596(16) |

|                      |           |                     |           |                     |           |
|----------------------|-----------|---------------------|-----------|---------------------|-----------|
| Dy1-O1               | 2.350(8)  | Dy3-O6              | 2.274(10) | Dy4-N9              | 2.563(12) |
| Dy1-O2               | 2.352(9)  | Dy3-O2 <sup>1</sup> | 2.411(10) | Dy4-N8              | 2.536(11) |
| Dy1-O22              | 2.327(9)  | Dy3-O7              | 2.315(9)  | Dy5-O3 <sup>1</sup> | 2.318(10) |
| Dy1-O21 <sup>1</sup> | 2.337(10) | Dy3-O19             | 2.326(11) | Dy5-O1 <sup>1</sup> | 2.420(10) |
| Dy1-N1               | 2.510(11) | Dy3-O20             | 2.345(11) | Dy5-O8              | 2.334(10) |
| Dy1-N4 <sup>1</sup>  | 2.521(11) | Dy3-O13             | 2.168(11) | Dy5-O14             | 2.377(10) |
| Dy2-O4 <sup>1</sup>  | 2.279(9)  | Dy3-N11             | 2.446(12) | Dy5-O12             | 2.197(11) |
| Dy2-O4               | 2.257(13) | Dy4-O1 <sup>1</sup> | 2.393(9)  | Dy5-O9              | 2.442(12) |
| Dy2-O5               | 2.359(15) | Dy4-O2 <sup>1</sup> | 2.421(8)  | Dy5-O10             | 2.493(15) |
| Dy2-N13              | 2.542(11) | Dy4-O8              | 2.355(10) | Dy5-N6              | 2.443(12) |
| Dy2-N3               | 2.534(9)  | Dy4-O7              | 2.389(11) | Dy5-N5              | 2.869(16) |
| Dy2-N14              | 2.521(11) | Dy4-O18             | 2.388(13) |                     |           |

**Bond angles (°)**

|                                      |          |                          |          |                                      |          |
|--------------------------------------|----------|--------------------------|----------|--------------------------------------|----------|
| O6 <sup>1</sup> -Dy1-O1              | 92.4(3)  | O4 <sup>1</sup> -Dy2-N3  | 85.0(3)  | O7-Dy4-O1 <sup>1</sup>               | 105.9(3) |
| O6 <sup>1</sup> -Dy1-O2              | 72.9(3)  | O4 <sup>1</sup> -Dy2-N14 | 139.0(4) | O7-Dy4-O2 <sup>1</sup>               | 67.4(3)  |
| O6 <sup>1</sup> -Dy1-N1              | 127.0(3) | O4-Dy2-N14               | 84.3(4)  | O7-Dy4-O15                           | 103.2(5) |
| O6 <sup>1</sup> -Dy1-N4 <sup>1</sup> | 70.4(3)  | O4 <sup>1</sup> -Dy2-N2  | 85.0(3)  | O7-Dy4-O16                           | 62.1(5)  |
| O3-Dy1-O6 <sup>1</sup>               | 161.0(3) | O6-Dy3-O2 <sup>1</sup>   | 73.1(3)  | O7-Dy4-N9                            | 62.4(4)  |
| O3-Dy1-O1                            | 71.9(3)  | O6-Dy3-O7                | 97.4(4)  | O7-Dy4-N8                            | 125.0(4) |
| O3-Dy1-O2                            | 91.9(3)  | O6-Dy3-O19               | 166.7(4) | O18-Dy4-O1 <sup>1</sup>              | 130.2(4) |
| O6 <sup>1</sup> -Dy1-O1              | 92.4(3)  | O6-Dy3-O20               | 92.0(4)  | O3 <sup>1</sup> -Dy5-O1 <sup>1</sup> | 70.5(3)  |
| O3-Dy1-O22                           | 108.6(4) | O6-Dy3-N11               | 112.4(4) | O3 <sup>1</sup> -Dy5-O8              | 87.8(3)  |
| O4-Dy2-O5                            | 152.7(4) | O2 <sup>1</sup> -Dy3-N11 | 132.7(4) | O3 <sup>1</sup> -Dy5-O14             | 92.1(3)  |
| O4 <sup>1</sup> -Dy2-N13             | 139.1(4) | O7-Dy3-O2 <sup>1</sup>   | 68.7(3)  | O3 <sup>1</sup> -Dy5-O9              | 151.1(5) |
| O4-Dy2-N13                           | 84.6(4)  | O7-Dy3-O19               | 84.2(4)  | O3 <sup>1</sup> -Dy5-O10             | 152.9(4) |
| O4-Dy2-N3                            | 91.4(4)  | O7-Dy4-O1 <sup>1</sup>   | 105.9(3) | O3 <sup>1</sup> -Dy5-N6              | 106.5(4) |

**Table S4.** Selected bond lengths (Å) and angles (°) of **3**.

| <b>Bond lengths (Å)</b> |           |        |           |
|-------------------------|-----------|--------|-----------|
| Dy1-O2 <sup>1</sup>     | 2.357(15) | Dy2-N3 | 2.493(18) |
| Dy1-O2                  | 2.357(15) | Dy2-O6 | 2.221(15) |

|                     |           |                      |           |
|---------------------|-----------|----------------------|-----------|
| Dy1-O1              | 2.147(15) | Dy3-O5               | 2.369(12) |
| Dy1-O1 <sup>1</sup> | 2.147(15) | Dy3-O4               | 2.191(16) |
| Dy1-O7 <sup>1</sup> | 2.613(16) | Dy3-O3               | 2.354(14) |
| Dy1-O7              | 2.613(15) | Dy3-O11 <sup>1</sup> | 2.413(15) |
| Dy1-N1              | 2.481(19) | Dy3-N6               | 2.511(18) |
| Dy1-N1 <sup>1</sup> | 2.481(18) | Dy3-O6 <sup>1</sup>  | 2.271(16) |
| Dy2-O5              | 2.286(7)  | Dy3-O10              | 2.198(14) |
| Dy2-O2              | 2.327(15) | Dy2-O9 <sup>1</sup>  | 2.478(17) |
| Dy2-O3              | 2.328(15) | Dy2-N4               | 2.507(17) |
| Dy2-O7 <sup>1</sup> | 2.516(14) |                      |           |

**Bond angles (°)**

|                                      |          |                         |          |
|--------------------------------------|----------|-------------------------|----------|
| O2-Dy1-O2 <sup>1</sup>               | 112.3(7) | O5-Dy2-N3               | 149.2(4) |
| O2 <sup>1</sup> -Dy1-O7              | 66.1(5)  | O2-Dy2-O3               | 161.3(5) |
| O2-Dy1-O7 <sup>1</sup>               | 66.1(5)  | O2-Dy2-O7 <sup>1</sup>  | 68.1(5)  |
| O2-Dy1-O7                            | 70.6(5)  | O5-Dy3-O11 <sup>1</sup> | 95.8(5)  |
| O2 <sup>1</sup> -Dy1-O7 <sup>1</sup> | 70.6(5)  | O5-Dy3-N6               | 131.1(4) |
| O2-Dy1-N1                            | 64.5(6)  | O4-Dy3-O5               | 154.6(4) |
| O2 <sup>1</sup> -Dy1-N1              | 145.2(6) | O4-Dy3-O3               | 130.8(5) |
| O2 <sup>1</sup> -Dy1-N1 <sup>1</sup> | 64.5(6)  | O4-Dy3-O11 <sup>1</sup> | 93.7(6)  |
| O5-Dy2-O2                            | 99.0(6)  | O4-Dy3-N6               | 70.5(6)  |
| O5-Dy2-O3                            | 76.5(5)  | O4-Dy3-O6 <sup>1</sup>  | 85.5(6)  |
| O5-Dy2-O7 <sup>1</sup>               | 82.6(5)  | O4-Dy3-O10              | 98.8(7)  |
| O5-Dy2-O9 <sup>1</sup>               | 129.1(4) | O3-Dy3-O5               | 74.4(4)  |
| O5-Dy2-N4                            | 131.0(6) | O3-Dy3-O11 <sup>1</sup> | 76.6(5)  |
